# Supplementary material
Source: Springer Nature journal article supplement (https://www.springermedizin.de/resource/supplementary/12884_2012_785_MOESM2_ESM.pdf/9458174)
Supplement: MOESM2 [file 9458174]

**Figure 2. BMI and Early Preterm Birth by Weight Gain**

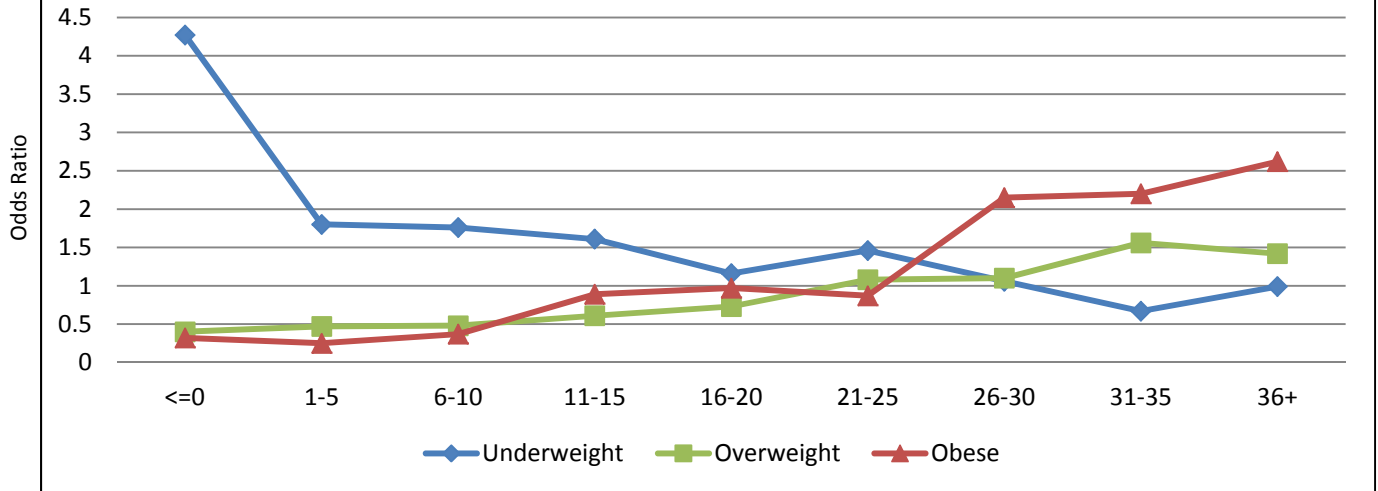

| <b>BMI</b>  | <b>&lt;=0</b> | <b>1-5</b> | <b>6-10</b> | <b>11-15</b> | <b>16-20</b> | <b>21-25</b> | <b>26-30</b> | <b>31-35</b> | <b>36+</b> |
|-------------|---------------|------------|-------------|--------------|--------------|--------------|--------------|--------------|------------|
| Underweight | 4.27*         | 1.8*       | 1.76***     | 1.61***      | 1.16         | 1.46         | 1.06         | 0.67         | 0.99       |
| Overweight  | 0.4*          | 0.47       | 0.48*       | 0.61**       | 0.73         | 1.08         | 1.1          | 1.56         | 1.42       |
| Obese       | 0.32***       | 0.25**     | 0.37**      | 0.89         | 0.97         | 0.87         | 2.15*        | 2.2          | 2.62*      |

\*\*\*p= < .0001 \*\*p=<.001 \*p=<.05
